# Supplementary material for: Geographic trends in incidence of hip fractures: a comprehensive literature review
Source: Springer Nature journal article supplement (doi:10.1007/s00198-011-1596-z), 2011-04-12
Supplement: 198_2011_1596_MOESM1_ESM.pdf [file 198_2011_1596_MOESM1_ESM.pdf]

**Caption: Detailed description of included hip fracture incidence studies.**

- A: **Non-residents** (patients who reside outside the study area but received treatment in the study area)
- B: **Pathological fractures** (fractures resulting from underlying diseases, including one or some of, but not limited to: Paget’s disease, neoplasms, metastases, bone cysts)
- C: **Second fracture** (patients with previous record of hip fracture, patients presenting with a second hip fracture)
- D: **Transfers** (patients transferred from another hospital/health institution (only one instance of the record kept))
- E: **Aftercare/complications/late effects** (diagnosis relating to orthopedic aftercare or complications from prior hip fracture surgery)
- F: **Trauma** (fractures resulting from (severe) trauma)

| Author, Year [reference] | Region, Country              | Study Period | Data Source                                                                  | Definition of Hip Fracture | Exclusions |   |   |   |   |   | Number of Cases Over Study Period                                                                                                                             | Age Range |
|--------------------------|------------------------------|--------------|------------------------------------------------------------------------------|----------------------------|------------|---|---|---|---|---|---------------------------------------------------------------------------------------------------------------------------------------------------------------|-----------|
|                          |                              |              |                                                                              |                            | A          | B | C | D | E | F |                                                                                                                                                               |           |
| <b>North America</b>     |                              |              |                                                                              |                            |            |   |   |   |   |   |                                                                                                                                                               |           |
| Fang, 2001 [18]          | New York City, United States | 1988 – 2002  | New York Department of Health’s acute-care discharge database                | ICD-9 820.0 – 820.9        |            |   |   |   |   |   | Whites:<br>53,125 women<br>14,576 men;<br>Blacks:<br>4,258 women<br>1,794 men;<br>Hispanics:<br>3,062 women<br>1,073 men;<br>Asian:<br>1,203 women<br>545 men | ≥ 50      |
| Jaglal, 1996 [19]        | Ontario, Canada              | 1981 – 1992  | From Hospital Medical Records Institute (hospital discharge data in Ontario) | ICD-9 820.0 – 820.9        |            |   |   | ✓ |   |   | 93,660                                                                                                                                                        | ≥ 50      |
| Levy, 1995 [20]          | Québec, Canada               | 1981 – 1992  | From province-wide database of hospital discharge information                | ICD-9 820.0 – 820.9        |            |   |   |   |   | ✓ | 33,796 women<br>11,923 men                                                                                                                                    | ≥ 45      |

| Author,<br>Year [reference]           | Region, Country                  | Study<br>Period        | Data Source                                                                             | Definition of Hip Fracture                                 | Exclusions |   |   |   |   |   | Number of Cases<br>Over Study Period                                                | Age<br>Range |
|---------------------------------------|----------------------------------|------------------------|-----------------------------------------------------------------------------------------|------------------------------------------------------------|------------|---|---|---|---|---|-------------------------------------------------------------------------------------|--------------|
|                                       |                                  |                        |                                                                                         |                                                            | A          | B | C | D | E | F |                                                                                     |              |
| Ross,<br>2000 [21]                    | Oahu, Hawaii, United States      | 1991 – 1995            | Hospital discharge data                                                                 | ICD-9-CM 820.0 – 820.9                                     | ✓          |   | ✓ |   |   | ✓ | Japanese Americans:<br>427 women<br>166 men;<br>Caucasians:<br>248 women<br>133 men | ≥ 45         |
| <b>Latin America</b>                  |                                  |                        |                                                                                         |                                                            |            |   |   |   |   |   |                                                                                     |              |
| Bagur,<br>1994 [22]                   | La Plata, Argentina              | 1989 – 1990            | Prospective survey of all major public and private hospitals with orthopedic facilities | Hip fracture (above the lesser trochanter)                 | ✓          | ✓ |   |   |   |   | 164 women<br>31 men                                                                 | ≥ 50         |
| Castro da Rocha,<br>2004 [23]         | Sobral, Brazil                   | 1996 – 2000            | Medical records from the Santa Casa de Misericórdia de Sobral                           | Proximal femoral fracture                                  | ✓          | ✓ |   |   | ✓ |   | 50 women<br>29 men                                                                  | ≥ 20         |
| Clark,<br>2005 [24]                   | Mexico City, Mexico              | 2000                   | Medical charts – initial diagnosis verified by surgical reports and/or x-rays           | ICD-10 S72.0, S72.1, S72.2                                 | ✓          |   |   |   |   |   | 748 women<br>319 men                                                                | ≥ 50         |
| Morosano,<br>2005 [25]                | Rosario, Argentina               | 2001 – 2002            | Admission and discharge registers, and medical and surgery department records           | Fracture of the proximal femur (cervical and trochanteric) | ✓          | ✓ |   |   | ✓ |   | 608 women<br>155 men                                                                | ≥ 50         |
| Schwartz,<br>1999 [26]                | Porto Alegre, Brazil             | 1990 – 1992            | Hospital discharge list and surgical department records                                 | ICD-9 820, 821                                             | ✓          |   |   | ✓ |   |   | Estimated 472                                                                       | ≥ 20         |
| <b>Europe (excluding Scandinavia)</b> |                                  |                        |                                                                                         |                                                            |            |   |   |   |   |   |                                                                                     |              |
| Beringer,<br>2000 [27]                | Northern Ireland, United Kingdom | 1985, 1991, 1994, 1997 | Theatre records of hospitals                                                            | Proximal femoral fracture                                  |            |   |   |   |   |   | 4,364 women<br>1,127 men                                                            | ≥ 50         |



| Author,<br>Year [reference] | Region, Country                                              | Study<br>Period             | Data Source                                                                                                               | Definition of Hip Fracture                                                                                          | Exclusions |   |   |   |   |   | Number of Cases<br>Over Study Period                               | Age<br>Range |
|-----------------------------|--------------------------------------------------------------|-----------------------------|---------------------------------------------------------------------------------------------------------------------------|---------------------------------------------------------------------------------------------------------------------|------------|---|---|---|---|---|--------------------------------------------------------------------|--------------|
|                             |                                                              |                             |                                                                                                                           |                                                                                                                     | A          | B | C | D | E | F |                                                                    |              |
| <b>Scandinavia</b>          |                                                              |                             |                                                                                                                           |                                                                                                                     |            |   |   |   |   |   |                                                                    |              |
| Bjørgul,<br>2007 [35]       | Østfold, Norway                                              | 1998 – 2003                 | All hip fractures treated at treated at Østfold Hospital Fredrikstad                                                      | Hip fracture (trochanteric and intracapsular)                                                                       |            |   |   |   |   |   | 1,270 women<br>460 men                                             | ≥ 40         |
| Finsen,<br>2004 [36]        | South Trøndelag and southern part of North Trøndelag, Norway | 1992 – 1993;<br>1997 – 1998 | Hand written surgery, radiology and hospital discharge reports                                                            | Trochanteric (intertrochanteric, pertrochanteric) or cervical (subcapital, transcervical, or basicervical) fracture | ✓          |   |   |   |   |   | 1,821 women<br>680 men                                             | > 50         |
| Giversen,<br>2006 [37]      | Viborg County, Denmark                                       | 1978;<br>1987 – 1997        | From National Patient Register                                                                                            | ICD-8 820.00 – 820.03<br>ICD-10 S72.0 – S72.2                                                                       | ✓          |   | ✓ |   |   | ✓ |                                                                    | > 50         |
| Löfman,<br>2002 [38]        | Östergötland, Sweden                                         | 1982 – 1996                 | Computerized registers of radiologic investigations                                                                       | ICD-8 820.00 – 820.01<br>ICD-9 820A – 820D                                                                          |            | ✓ |   | ✓ |   |   | 483 women<br>178 men in 1982;<br>604 women<br>257 men in 1996      | ≥ 50         |
| Lofthus,<br>2001 [39]       | Oslo, Norway                                                 | 1996 – 1997                 | Electronic diagnosis registers                                                                                            | ICD-9 820.X                                                                                                         |            | ✓ |   |   |   |   | 1,024 women<br>292 men                                             | All ages     |
| Lönnroos,<br>2006 [40]      | Central Finland, Finland                                     | 2002 – 2003                 | Hospital discharge register, register from the Department of Anesthesiology and handwritten lists of emergency operations | ICD-10 S72.0 – S72.2                                                                                                | ✓          |   |   |   |   |   | 412 women<br>165 men                                               | ≥ 55         |
| Nymark,<br>2006 [41]        | Funen County, Denmark                                        | 1996 – 2003                 | From Central Patient Administrative System                                                                                | ICD-10 S72.0, S72.1, S72.2, T84.1, T93.1                                                                            |            |   | ✓ |   |   |   | 6676 verified 1 <sup>st</sup> fracture<br>520 subsequent fractures | ≥ 50         |
| Rogmark,<br>1999 [42]       | Malmö, Sweden                                                | 1992 – 1995                 | Computer-based clinical and operating room reports                                                                        | Hip fracture                                                                                                        | ✓          |   |   |   |   |   | 1,724 women<br>544 men                                             | ≥ 50         |

| Author, Year [reference] | Region, Country           | Study Period | Data Source                                                                                           | Definition of Hip Fracture                                                                                                            | Exclusions |   |   |   |   |   | Number of Cases Over Study Period | Age Range     |
|--------------------------|---------------------------|--------------|-------------------------------------------------------------------------------------------------------|---------------------------------------------------------------------------------------------------------------------------------------|------------|---|---|---|---|---|-----------------------------------|---------------|
|                          |                           |              |                                                                                                       |                                                                                                                                       | A          | B | C | D | E | F |                                   |               |
| Schwartz, 1999 [26]      | Reykjavik, Iceland        | 1990 – 1992  | Hospital discharge list                                                                               | ICD-9 820, 821                                                                                                                        | ✓          |   |   | ✓ |   |   | Estimated 579                     | ≥ 20          |
| <b>Africa</b>            |                           |              |                                                                                                       |                                                                                                                                       |            |   |   |   |   |   |                                   |               |
| El Maghraoui, 2005 [43]  | Rabat, Morocco            | 2002         | Hospital registers and medical records                                                                | ICD-9 820, 820.0, 820.2, 820.8 (closed hip fractures)                                                                                 | ✓          | ✓ |   |   | ✓ |   | 83 women<br>67 men                | ≥ 50          |
| Zebaze, 2003 [44]        | Cameroon                  | 1996 – 1998  | Surgical and radiologic evidence from patients admitted to two hospitals.                             | Hip fracture                                                                                                                          |            |   |   |   |   |   | 26 women<br>29 men                | ≥ 35          |
| <b>Asia</b>              |                           |              |                                                                                                       |                                                                                                                                       |            |   |   |   |   |   |                                   |               |
| Al-Nuaim, 1995 [45]      | Riyadh, Saudi Arabia      | 1990 – 1991  | Case records cross checked with Emergency room, Orthopedic department, and Medical Record departments | Proximal femur fracture                                                                                                               | ✓          | ✓ |   |   |   |   | 51 women<br>52 men                | ≥ 40          |
| Baddoura, 2001 [46]      | Beirut, Lebanon           | 1996         | Questionnaires completed by all orthopaedic surgeons                                                  | Fracture trait of the proximal femur that could be sub-capital, in the femoral neck or in the trochanteric and intertrochanteric area | ✓          |   |   |   |   |   | 40 women<br>23 men                | ≥ 30<br>< 100 |
| Hagino, 2005 [47]        | Tottori Prefecture, Japan | 1998 – 2001  | Survey registration according to hospital records                                                     | Hip fracture                                                                                                                          | ✓          |   |   |   |   |   | 2,170 women<br>544 men            | ≥ 35          |
| Huang, 2000 [48]         | Kaohsiung City, Taiwan    | 1996         | From the National Health Insurance program                                                            | ICD-9-CM 820.0 – 820.9                                                                                                                |            | ✓ |   |   |   | ✓ | 319 women<br>261 men              | All ages      |
| Iga, 1999 [49]           | Hiigata Prefecture, Japan | 1994         | Medical records and radiographs                                                                       | Hip fracture (cervical or trochanteric)                                                                                               | ✓          | ✓ |   |   |   |   | 1,090 women<br>378 men            | ≥ 20          |

| Author,<br>Year [reference] | Region, Country                                | Study<br>Period | Data Source                                                                                                                    | Definition of Hip Fracture                   | Exclusions |   |   |   |   |   | Number of Cases<br>Over Study Period                                                                    | Age<br>Range |
|-----------------------------|------------------------------------------------|-----------------|--------------------------------------------------------------------------------------------------------------------------------|----------------------------------------------|------------|---|---|---|---|---|---------------------------------------------------------------------------------------------------------|--------------|
|                             |                                                |                 |                                                                                                                                |                                              | A          | B | C | D | E | F |                                                                                                         |              |
| Ikeda,<br>1994 [50]         | Nagasaki Prefecture,<br>Japan                  | 1989 – 1990     | Questionnaires<br>completed by medical<br>institutions                                                                         | Fracture of the neck of the<br>femur         |            |   |   |   |   |   | 1989:<br>801 women<br>203 men;<br>1990<br>814 women<br>195 men                                          | ≥ 20         |
| Koh,<br>2001 [51]           | Singapore                                      | 1985 – 1998     | From the National<br>Patient Master Index<br>and the Central Claims<br>Processing System                                       | ICD-9 820, 820.0, 820.2,<br>820.89           |            |   | ✓ | ✓ |   |   | 9406                                                                                                    | ≥ 50         |
| Lau,<br>2001 [52]           | Hong Kong,<br>Singapore, Malaysia,<br>Thailand | 1997            | Hospital discharge<br>records                                                                                                  | Hip fracture                                 | ✓          | ✓ |   |   |   |   | 2,914 women<br>1,145 men;<br>1,380 women<br>445 men;<br>1,565 women<br>707 men;<br>266 women<br>125 men | ≥ 50         |
| Lim,<br>2008 [53]           | Korea                                          | 2001; 2004      | From Health Insurance<br>Review Agency                                                                                         | ICD-10 S72.0, S72.1                          |            |   |   |   |   |   | 20,830 2001<br>23,307 2004                                                                              | > 50         |
| Memon,<br>1998 [54]         | Capital, Hawali and<br>Farwania, Kuwait        | 1992 – 1995     | Clinical and<br>radiological evidence                                                                                          | Cervical, trochanteric or<br>subtrochanteric | ✓          | ✓ |   |   |   |   | 205 women<br>308 men                                                                                    | ≥ 10         |
| Moayyeri,<br>2006 [55]      | Iran                                           | 2003            | From the Iranian<br>Multicenter Study on<br>Accidental Injuries<br>(questionnaires that<br>were radiographically<br>confirmed) | Proximal femur fractures                     |            |   |   |   |   |   | 271 women<br>284 men                                                                                    | > 50         |

| Author,<br>Year [reference] | Region, Country                               | Study<br>Period | Data Source                                                                                  | Definition of Hip Fracture                                                                                                            | Exclusions |   |   |   |   |   | Number of Cases<br>Over Study Period                             | Age<br>Range |
|-----------------------------|-----------------------------------------------|-----------------|----------------------------------------------------------------------------------------------|---------------------------------------------------------------------------------------------------------------------------------------|------------|---|---|---|---|---|------------------------------------------------------------------|--------------|
|                             |                                               |                 |                                                                                              |                                                                                                                                       | A          | B | C | D | E | F |                                                                  |              |
| Orimo,<br>2000 [56]         | Japan                                         | 1997            | Questionnaires from<br>sample of hospitals                                                   | Hip fracture                                                                                                                          |            |   |   |   |   |   | 36,730 women<br>10,826 men<br>(extrapolated to<br>entire nation) | All ages     |
| Rowe,<br>2005 [57]          | Gwangju City and<br>Chonam Province,<br>Korea | 2001            | From the Health<br>Insurance Review<br>Agency                                                | Hip fracture                                                                                                                          |            |   |   |   |   |   | 730 women<br>422 men                                             | ≥ 50         |
| Schwartz,<br>1999 [26]      | Beijing, China                                | 1990 – 1992     | Discharge reports and<br>operating room log<br>review                                        | ICD-9 820, 821                                                                                                                        | ✓          |   |   | ✓ |   |   | Estimated 5,881                                                  | ≥ 20         |
| Schwartz,<br>1999 [26]      | Hong Kong                                     | 1991            | Discharge list and<br>operating room logs                                                    | ICD-9 820, 821                                                                                                                        | ✓          |   |   | ✓ |   |   | Estimated 3,266                                                  | ≥ 20         |
| Shukla,<br>2008 [58]        | South Sharqiya,<br>Oman                       | 2002 – 2007     | Hospital records and<br>case records from the<br>Health Information and<br>Management System | Fracture trait of the proximal<br>femur (sub-capital, in the<br>femoral neck or in the<br>trochanteric and<br>intertrochanteric area) |            |   |   |   | ✓ |   | 77 women<br>70 men                                               | > 40         |
| Soveid,<br>2005 [59]        | Shirz, Iran                                   | 2000 – 2003     | Operating room logs                                                                          | Hip fracture                                                                                                                          | ✓          | ✓ | ✓ | ✓ |   | ✓ | 1,070 women<br>763 men                                           | > 50         |
| Yan,<br>1999 [60]           | Shenyang, China                               | 1994            | Hospital registers and<br>original medical<br>records                                        | ICD-9 820                                                                                                                             | ✓          | ✓ |   | ✓ |   | ✓ | 206 women<br>247 men                                             | > 50         |
| Zhang,<br>2000 [61]         | Tangshan, China                               | 1994            | Medical records and<br>radiographs                                                           | Hip fracture (cervical or<br>trochanteric)                                                                                            | ✓          | ✓ |   |   |   |   | 57 women<br>127 men                                              | ≥ 20         |
| <b>Australia</b>            |                                               |                 |                                                                                              |                                                                                                                                       |            |   |   |   |   |   |                                                                  |              |
| Boufous,<br>2004 [62]       | New South Wales,<br>Australia                 | 1990 – 2000     | Inpatient Statistics<br>Collection                                                           | ICD-9 820<br>ICD-10 S72.0 – S 72.2                                                                                                    |            |   |   |   |   |   | 7,305 women<br>2,562 men                                         | ≥ 50         |

| Author,<br>Year [reference] | Region, Country                 | Study<br>Period | Data Source          | Definition of Hip Fracture                                                                               | Exclusions |   |   |   |   |   | Number of Cases<br>Over Study Period | Age<br>Range |
|-----------------------------|---------------------------------|-----------------|----------------------|----------------------------------------------------------------------------------------------------------|------------|---|---|---|---|---|--------------------------------------|--------------|
|                             |                                 |                 |                      |                                                                                                          | A          | B | C | D | E | F |                                      |              |
| Sanders,<br>1999 [63]       | Southern Victoria,<br>Australia | 1994 – 1996     | Radiological reports | Computerized keyword search<br>of all radiological reports from<br>the two medical imaging<br>practices. | ✓          | ✓ |   |   |   |   | 1,380 women<br>804 men               | ≥ 35         |
