# Supplementary material for: Geographic trends in incidence of hip fractures: a comprehensive literature review
Source: Springer Nature journal article supplement (doi:10.1007/s00198-011-1596-z), 2011-04-12
Supplement: 198_2011_1596_MOESM2_ESM.pdf [file 198_2011_1596_MOESM2_ESM.pdf]

**Caption: Annual age-sex-specific hip fracture rates (per 10,000 population) by sex, age group and geographic area.**

| Region, Country<br>[reference]        | Study Period           | Age group (years) |       |       |       |       |       |       |       |       |     |       |       |       |       |       |       |       |       |       |      |       |  |     |  |      |       |       |      |  |      |       |      |  |       |  |     |  |      |  |      |  |      |  |      |  |       |  |       |  |  |  |
|---------------------------------------|------------------------|-------------------|-------|-------|-------|-------|-------|-------|-------|-------|-----|-------|-------|-------|-------|-------|-------|-------|-------|-------|------|-------|--|-----|--|------|-------|-------|------|--|------|-------|------|--|-------|--|-----|--|------|--|------|--|------|--|------|--|-------|--|-------|--|--|--|
|                                       |                        | Women             |       |       |       |       |       |       |       |       |     | Men   |       |       |       |       |       |       |       |       |      |       |  |     |  |      |       |       |      |  |      |       |      |  |       |  |     |  |      |  |      |  |      |  |      |  |       |  |       |  |  |  |
|                                       |                        | 50-54             | 55-59 | 60-64 | 65-69 | 70-74 | 75-79 | 80-84 | 85-89 | 90-94 | ≥95 | 50-54 | 55-59 | 60-64 | 65-69 | 70-74 | 75-79 | 80-84 | 85-89 | 90-94 | ≥95  |       |  |     |  |      |       |       |      |  |      |       |      |  |       |  |     |  |      |  |      |  |      |  |      |  |       |  |       |  |  |  |
| <b>North America</b>                  |                        |                   |       |       |       |       |       |       |       |       |     |       |       |       |       |       |       |       |       |       |      |       |  |     |  |      |       |       |      |  |      |       |      |  |       |  |     |  |      |  |      |  |      |  |      |  |       |  |       |  |  |  |
| New York City, US<br>[18]             | 1988-2002 <sup>a</sup> | 1.2               |       |       |       |       | 5.2   |       |       |       |     | 22.8  |       |       |       |       | 88.2  |       |       |       |      | 1.0   |  | 2.7 |  | 11.6 |       | 56.3  |      |  |      |       |      |  |       |  |     |  |      |  |      |  |      |  |      |  |       |  |       |  |  |  |
|                                       | 1988-2002 <sup>b</sup> | 1.4               |       |       |       |       | 5.1   |       |       |       |     | 17.1  |       |       |       |       | 67.8  |       |       |       |      | 2.8   |  | 5.3 |  | 14.0 |       | 45.2  |      |  |      |       |      |  |       |  |     |  |      |  |      |  |      |  |      |  |       |  |       |  |  |  |
|                                       | 1988-2002 <sup>c</sup> | 1.0               |       |       |       |       | 4.3   |       |       |       |     | 17.6  |       |       |       |       | 74.9  |       |       |       |      | 1.4   |  | 3.0 |  | 10.4 |       | 42.6  |      |  |      |       |      |  |       |  |     |  |      |  |      |  |      |  |      |  |       |  |       |  |  |  |
|                                       | 1988-2002 <sup>d</sup> | 4.6               |       |       |       |       | 17.1  |       |       |       |     | 61.3  |       |       |       |       | 219.6 |       |       |       |      | 3.5   |  | 9.0 |  | 28.1 |       | 110.2 |      |  |      |       |      |  |       |  |     |  |      |  |      |  |      |  |      |  |       |  |       |  |  |  |
| Quebec, CA [20]                       | 1981                   | 5.7               |       |       |       |       | 23.2  |       |       |       |     | 67.2  |       |       |       |       | 123.6 |       |       |       |      | 220.1 |  |     |  |      | 3.3   |       | 12.3 |  | 38.9 |       | 60.8 |  | 121.3 |  |     |  |      |  |      |  |      |  |      |  |       |  |       |  |  |  |
|                                       | 1982                   | 5.3               |       |       |       |       | 20.7  |       |       |       |     | 67.9  |       |       |       |       | 129.8 |       |       |       |      | 229.4 |  |     |  |      | 4.1   |       | 12.8 |  | 33.7 |       | 61.8 |  | 132.5 |  |     |  |      |  |      |  |      |  |      |  |       |  |       |  |  |  |
|                                       | 1983                   | 5.8               |       |       |       |       | 21.8  |       |       |       |     | 70.0  |       |       |       |       | 132.3 |       |       |       |      | 264.7 |  |     |  |      | 4.0   |       | 13.4 |  | 34.9 |       | 71.3 |  | 127.0 |  |     |  |      |  |      |  |      |  |      |  |       |  |       |  |  |  |
|                                       | 1984                   | 5.5               |       |       |       |       | 22.2  |       |       |       |     | 66.3  |       |       |       |       | 129.8 |       |       |       |      | 242.8 |  |     |  |      | 3.9   |       | 12.4 |  | 31.5 |       | 67.9 |  | 141.7 |  |     |  |      |  |      |  |      |  |      |  |       |  |       |  |  |  |
|                                       | 1985                   | 5.4               |       |       |       |       | 23.1  |       |       |       |     | 66.3  |       |       |       |       | 129.1 |       |       |       |      | 246.3 |  |     |  |      | 3.3   |       | 13.1 |  | 32.1 |       | 77.8 |  | 149.3 |  |     |  |      |  |      |  |      |  |      |  |       |  |       |  |  |  |
|                                       | 1986                   | 5.5               |       |       |       |       | 22.4  |       |       |       |     | 59.5  |       |       |       |       | 119.6 |       |       |       |      | 235.8 |  |     |  |      | 3.8   |       | 12.9 |  | 34.9 |       | 65.5 |  | 128.3 |  |     |  |      |  |      |  |      |  |      |  |       |  |       |  |  |  |
|                                       | 1987                   | 5.9               |       |       |       |       | 21.5  |       |       |       |     | 64.9  |       |       |       |       | 131.3 |       |       |       |      | 248.8 |  |     |  |      | 3.7   |       | 13.6 |  | 37.0 |       | 68.2 |  | 123.7 |  |     |  |      |  |      |  |      |  |      |  |       |  |       |  |  |  |
|                                       | 1988                   | 5.2               |       |       |       |       | 23.7  |       |       |       |     | 68.2  |       |       |       |       | 134.3 |       |       |       |      | 264.6 |  |     |  |      | 3.7   |       | 14.5 |  | 34.3 |       | 74.4 |  | 154.2 |  |     |  |      |  |      |  |      |  |      |  |       |  |       |  |  |  |
|                                       | 1989                   | 5.5               |       |       |       |       | 23.8  |       |       |       |     | 65.5  |       |       |       |       | 118.2 |       |       |       |      | 237.1 |  |     |  |      | 4.4   |       | 14.0 |  | 34.8 |       | 69.1 |  | 134.5 |  |     |  |      |  |      |  |      |  |      |  |       |  |       |  |  |  |
|                                       | 1990                   | 5.2               |       |       |       |       | 23.3  |       |       |       |     | 71.4  |       |       |       |       | 131.1 |       |       |       |      | 253.5 |  |     |  |      | 4.3   |       | 10.8 |  | 33.7 |       | 58.9 |  | 135.5 |  |     |  |      |  |      |  |      |  |      |  |       |  |       |  |  |  |
|                                       | 1991                   | 5.3               |       |       |       |       | 20.3  |       |       |       |     | 66.1  |       |       |       |       | 125.8 |       |       |       |      | 239.0 |  |     |  |      | 4.0   |       | 11.2 |  | 34.1 |       | 66.7 |  | 150.3 |  |     |  |      |  |      |  |      |  |      |  |       |  |       |  |  |  |
|                                       | 1992                   | 4.9               |       |       |       |       | 22.7  |       |       |       |     | 64.5  |       |       |       |       | 124.1 |       |       |       |      | 238.9 |  |     |  |      | 3.3   |       | 12.0 |  | 34.1 |       | 68.6 |  | 140.8 |  |     |  |      |  |      |  |      |  |      |  |       |  |       |  |  |  |
| Oahu, Hawaii,<br>US[21]               | 1991-1995 <sup>e</sup> | 1.5               | 1.6   | 4.5   | 7.8   | 18.1  | 39.2  | 76.5  | 146.5 |       |     |       |       | 1.2   | 1.8   | 2.9   | 4.3   | 10.1  | 22.4  | 39.0  | 81.6 |       |  |     |  |      |       |       |      |  |      |       |      |  |       |  |     |  |      |  |      |  |      |  |      |  |       |  |       |  |  |  |
|                                       | 1991-1995 <sup>f</sup> | 2.3               | 0.9   | 6.1   | 8.4   | 17.9  | 35.6  | 55.4  | 88.2  |       |     |       |       | 0.6   | 1.6   | 3.5   | 5.5   | 9.4   | 18.0  | 43.9  | 76.6 |       |  |     |  |      |       |       |      |  |      |       |      |  |       |  |     |  |      |  |      |  |      |  |      |  |       |  |       |  |  |  |
|                                       | 1991-1995 <sup>g</sup> | 0.3               | 1.2   | 1.6   | 5.8   | 17.4  | 41.4  | 82.8  | 157.5 |       |     |       |       | 2.3   | 0.4   | 1.4   | 3.0   | 8.4   | 27.7  | 44.1  | 85.7 |       |  |     |  |      |       |       |      |  |      |       |      |  |       |  |     |  |      |  |      |  |      |  |      |  |       |  |       |  |  |  |
| Ontario, CA [19]                      | 1981-1992              | 3.0               | 7.0   | 11.0  | 21.0  | 41.0  | 85.0  | 169.0 | 291.0 | 401.0 | 3.0 | 5.0   | 7.0   | 12.0  | 22.0  | 42.0  | 81.0  | 149.0 | 250.0 |       |      |       |  |     |  |      |       |       |      |  |      |       |      |  |       |  |     |  |      |  |      |  |      |  |      |  |       |  |       |  |  |  |
| <b>Latin America</b>                  |                        |                   |       |       |       |       |       |       |       |       |     |       |       |       |       |       |       |       |       |       |      |       |  |     |  |      |       |       |      |  |      |       |      |  |       |  |     |  |      |  |      |  |      |  |      |  |       |  |       |  |  |  |
| La Plata, AR [22]                     | 1989-1990              | 1.1               |       |       |       |       | 10.3  |       |       |       |     | 62.1  |       |       |       |       | 280.7 |       |       |       |      | 2.8   |  | 4.1 |  | 20.8 |       | 79.6  |      |  |      |       |      |  |       |  |     |  |      |  |      |  |      |  |      |  |       |  |       |  |  |  |
| Sobral, BR [23]                       | 1996-2000              | 1.7               |       |       |       |       | 7.4   |       |       |       |     | 24.0  |       |       |       |       | 62.0  |       |       |       |      | 1.4   |  | 4.7 |  | 10.1 |       | 22.7  |      |  |      |       |      |  |       |  |     |  |      |  |      |  |      |  |      |  |       |  |       |  |  |  |
| Mexico City, MX [24]                  | 2000                   | 2.0               |       |       |       |       | 7.6   |       |       |       |     | 29.5  |       |       |       |       | 113.7 |       |       |       |      | 2.0   |  | 5.2 |  | 16.2 |       | 68.8  |      |  |      |       |      |  |       |  |     |  |      |  |      |  |      |  |      |  |       |  |       |  |  |  |
| Rosario, Santa Fe,<br>AR [25]         | 2001-2002              | 1.5               |       |       |       |       | 9.7   |       |       |       |     | 52.7  |       |       |       |       | 295.4 |       |       |       |      | 1.5   |  | 6.2 |  | 28.6 |       | 80.7  |      |  |      |       |      |  |       |  |     |  |      |  |      |  |      |  |      |  |       |  |       |  |  |  |
| Porto Alegre, BR<br>[26]              | 1990-1992 <sup>h</sup> | 3.5               |       |       |       |       | 8.4   |       |       |       |     | 53.1  |       |       |       |       | 126.3 |       |       |       |      | 225.2 |  |     |  |      | 2.6   |       | 10.6 |  | 15.9 |       | 61.8 |  | 114.4 |  |     |  |      |  |      |  |      |  |      |  |       |  |       |  |  |  |
|                                       | 1990-1992 <sup>i</sup> | 2.1               |       |       |       |       | 5.2   |       |       |       |     | 32.8  |       |       |       |       | 78.0  |       |       |       |      | 139.0 |  |     |  |      | 1.6   |       | 6.6  |  | 9.8  |       | 38.2 |  | 70.6  |  |     |  |      |  |      |  |      |  |      |  |       |  |       |  |  |  |
| <b>Europe (excluding Scandinavia)</b> |                        |                   |       |       |       |       |       |       |       |       |     |       |       |       |       |       |       |       |       |       |      |       |  |     |  |      |       |       |      |  |      |       |      |  |       |  |     |  |      |  |      |  |      |  |      |  |       |  |       |  |  |  |
| Greece [33]                           | 1992                   | 5.5               |       |       |       |       | 17.4  |       |       |       |     | 65.0  |       |       |       |       | 179.8 |       |       |       |      | 4.3   |  | 9.0 |  | 32.6 |       | 105.1 |      |  |      |       |      |  |       |  |     |  |      |  |      |  |      |  |      |  |       |  |       |  |  |  |
| Austria [32]                          | 1994                   | 5.9               |       |       |       |       | 12.3  |       |       |       |     | 24.5  |       |       |       |       | 51.0  |       |       |       |      | 94.0  |  |     |  |      | 174.6 |       |      |  |      | 412.3 |      |  |       |  | 8.8 |  | 11.0 |  | 18.2 |  | 28.0 |  | 49.9 |  | 83.8  |  | 209.0 |  |  |  |
|                                       | 1995                   | 6.1               |       |       |       |       | 12.8  |       |       |       |     | 24.7  |       |       |       |       | 51.1  |       |       |       |      | 109.5 |  |     |  |      | 170.1 |       |      |  |      | 425.0 |      |  |       |  | 8.5 |  | 13.4 |  | 20.8 |  | 30.3 |  | 53.3 |  | 86.6  |  | 219.4 |  |  |  |
|                                       | 1996                   | 7.0               |       |       |       |       | 13.8  |       |       |       |     | 26.1  |       |       |       |       | 52.1  |       |       |       |      | 117.0 |  |     |  |      | 181.0 |       |      |  |      | 422.7 |      |  |       |  | 9.1 |  | 12.5 |  | 17.4 |  | 29.6 |  | 55.9 |  | 87.8  |  | 220.8 |  |  |  |
|                                       | 1997                   | 6.9               |       |       |       |       | 12.5  |       |       |       |     | 25.2  |       |       |       |       | 50.1  |       |       |       |      | 120.0 |  |     |  |      | 193.1 |       |      |  |      | 447.2 |      |  |       |  | 8.7 |  | 12.2 |  | 19.6 |  | 32.3 |  | 67.4 |  | 81.3  |  | 225.8 |  |  |  |
|                                       | 1998                   | 5.9               |       |       |       |       | 14.2  |       |       |       |     | 23.1  |       |       |       |       | 49.1  |       |       |       |      | 125.6 |  |     |  |      | 180.9 |       |      |  |      | 457.4 |      |  |       |  | 7.3 |  | 13.2 |  | 16.7 |  | 31.1 |  | 60.3 |  | 87.9  |  | 240.0 |  |  |  |
|                                       | 1999                   | 6.1               |       |       |       |       | 14.8  |       |       |       |     | 25.2  |       |       |       |       | 53.3  |       |       |       |      | 116.4 |  |     |  |      | 215.4 |       |      |  |      | 439.9 |      |  |       |  | 7.3 |  | 15.3 |  | 19.1 |  | 27.8 |  | 57.7 |  | 102.3 |  | 226.1 |  |  |  |
|                                       | 2000                   | 6.3               |       |       |       |       | 14.1  |       |       |       |     | 22.1  |       |       |       |       | 46.6  |       |       |       |      | 108.8 |  |     |  |      | 236.8 |       |      |  |      | 414.9 |      |  |       |  | 8.3 |  | 14.0 |  | 14.3 |  | 34.0 |  | 54.5 |  | 115.1 |  | 224.7 |  |  |  |
|                                       | 2001                   | 6.0               |       |       |       |       | 13.9  |       |       |       |     | 25.3  |       |       |       |       | 51.8  |       |       |       |      | 100.3 |  |     |  |      | 259.7 |       |      |  |      | 431.1 |      |  |       |  | 7.9 |  | 13.1 |  | 16.0 |  | 29.6 |  | 59.7 |  | 116.8 |  | 242.2 |  |  |  |
|                                       | 2002                   | 6.6               |       |       |       |       | 13.6  |       |       |       |     | 20.5  |       |       |       |       | 51.3  |       |       |       |      | 102.3 |  |     |  |      | 258.0 |       |      |  |      | 426.4 |      |  |       |  | 7.8 |  | 12.8 |  | 16.1 |  | 31.1 |  | 57.6 |  | 125.6 |  | 225.9 |  |  |  |
|                                       | 2003                   | 6.0               |       |       |       |       | 14.5  |       |       |       |     | 27.8  |       |       |       |       | 52.4  |       |       |       |      | 107.9 |  |     |  |      | 241.4 |       |      |  |      | 442.2 |      |  |       |  | 7.5 |  | 12.7 |  | 20.3 |  | 30.0 |  | 59.3 |  | 124.2 |  | 256.2 |  |  |  |
|                                       | 2004                   | 6.4               |       |       |       |       | 12.3  |       |       |       |     | 26.5  |       |       |       |       | 50.3  |       |       |       |      | 100.4 |  |     |  |      | 214.6 |       |      |  |      | 470.2 |      |  |       |  | 7.3 |  | 10.7 |  | 22.0 |  | 33.7 |  | 56.6 |  | 111.6 |  | 275.7 |  |  |  |

| Region, Country<br>[reference] | Study Period             | Age group (years) |       |       |       |       |       |       |       |       |       |       |       |       |       |       |       |       |       |       |       |
|--------------------------------|--------------------------|-------------------|-------|-------|-------|-------|-------|-------|-------|-------|-------|-------|-------|-------|-------|-------|-------|-------|-------|-------|-------|
|                                |                          | Women             |       |       |       |       |       |       |       |       |       | Men   |       |       |       |       |       |       |       |       |       |
|                                |                          | 50-54             | 55-59 | 60-64 | 65-69 | 70-74 | 75-79 | 80-84 | 85-89 | 90-94 | ≥95   | 50-54 | 55-59 | 60-64 | 65-69 | 70-74 | 75-79 | 80-84 | 85-89 | 90-94 | ≥95   |
| Cantabria, ES [28]             | 2005                     | 6.9               |       | 12.6  | 27.3  | 50.8  | 112.8 | 207.6 | 478.1 |       |       |       |       |       |       |       |       |       |       |       |       |
|                                | 2006                     | 6.5               |       | 15.4  | 26.9  | 52.8  | 103.6 | 202.9 | 460.0 |       |       |       |       |       |       |       |       |       |       |       |       |
|                                | 1988                     | 0.8               | 1.9   | 1.2   | 3.5   | 15.4  | 40.0  | 111.2 | 194.8 |       |       |       |       |       |       |       |       |       |       |       |       |
|                                | 2002                     | 1.1               | 2.1   | 1.7   | 4.6   | 16.1  | 45.1  | 116.3 | 249.8 |       |       |       |       |       |       |       |       |       |       |       |       |
| Germany [29]                   | 1995                     | 4.6               |       | 9.9   | 19.4  | 39.7  | 67.8  | 144.9 | 230.3 | 332.2 |       |       |       |       |       |       |       |       |       |       |       |
|                                | 1996                     | 4.8               |       | 9.9   | 20.1  | 41.5  | 69.6  | 157.1 | 242.9 | 346.4 |       |       |       |       |       |       |       |       |       |       |       |
|                                | 1997                     | 4.4               |       | 9.1   | 19.1  | 38.4  | 67.7  | 160.9 | 231.9 | 334.1 |       |       |       |       |       |       |       |       |       |       |       |
|                                | 1998                     | 4.3               |       | 8.6   | 18.8  | 38.0  | 72.2  | 160.7 | 240.7 | 343.1 |       |       |       |       |       |       |       |       |       |       |       |
|                                | 1999                     | 4.2               |       | 8.7   | 17.7  | 37.9  | 79.6  | 148.1 | 245.5 | 340.0 |       |       |       |       |       |       |       |       |       |       |       |
|                                | 2000                     | 4.3               |       | 8.3   | 16.9  | 36.4  | 78.5  | 128.5 | 251.9 | 330.8 |       |       |       |       |       |       |       |       |       |       |       |
|                                | 2001                     | 4.1               |       | 8.0   | 16.6  | 36.2  | 80.1  | 131.4 | 273.4 | 344.7 |       |       |       |       |       |       |       |       |       |       |       |
|                                | 2002                     | 4.5               |       | 8.8   | 16.7  | 39.3  | 82.0  | 142.6 | 290.4 | 355.0 |       |       |       |       |       |       |       |       |       |       |       |
|                                | 2003                     | 4.6               |       | 9.0   | 16.2  | 37.7  | 81.4  | 151.1 | 292.8 | 356.2 |       |       |       |       |       |       |       |       |       |       |       |
|                                | 2004                     | 4.5               |       | 9.5   | 15.5  | 35.1  | 76.5  | 155.6 | 254.4 | 355.2 |       |       |       |       |       |       |       |       |       |       |       |
| Budapest, HU [26]              | 1992                     | 3.9               | 4.6   | 8.4   | 19.3  | 28.8  | 56.5  | 110.1 | 165.3 | 221.7 |       |       |       |       |       |       |       |       |       |       |       |
| Northern Ireland, UK [27]      | 1985                     | 5.5               |       | 9.7   | 10.1  | 16.8  | 38.2  | 74.1  | 124.7 | 217.5 | 262.3 |       |       |       |       |       |       |       |       |       |       |
|                                | 1991                     | 4.3               |       | 8.8   | 9.7   | 18.5  | 38.7  | 83.3  | 141.9 | 227.8 | 329.2 |       |       |       |       |       |       |       |       |       |       |
|                                | 1994                     | 3.0               |       | 7.1   | 13.4  | 17.0  | 39.3  | 83.3  | 166.6 | 254.1 | 338.1 |       |       |       |       |       |       |       |       |       |       |
|                                | 1997                     | 3.9               |       | 4.7   | 8.0   | 19.6  | 41.4  | 91.2  | 152.7 | 260.7 | 471.4 |       |       |       |       |       |       |       |       |       |       |
| Vaud, CH [30]                  | 1986                     | 5.5               |       | 9.2   | 18.5  | 21.2  | 37.7  | 66.4  | 169.4 | 274.9 | 240.8 |       |       |       |       |       |       |       |       |       |       |
|                                | 1987                     | 3.7               |       | 15.0  | 16.0  | 15.9  | 52.6  | 63.8  | 137.3 | 255.2 | 353.5 |       |       |       |       |       |       |       |       |       |       |
|                                | 1988                     | 6.2               |       | 3.2   | 12.8  | 19.7  | 47.3  | 91.8  | 194.2 | 259.7 | 362.6 |       |       |       |       |       |       |       |       |       |       |
|                                | 1989                     | 4.3               |       | 7.1   | 15.6  | 19.0  | 51.4  | 77.6  | 181.2 | 262.9 | 347.5 |       |       |       |       |       |       |       |       |       |       |
|                                | 1990                     | 3.0               |       | 5.7   | 17.6  | 26.9  | 29.1  | 69.1  | 155.4 | 239.9 | 431.1 |       |       |       |       |       |       |       |       |       |       |
|                                | 1991                     | 3.0               |       | 9.5   | 9.5   | 16.5  | 49.4  | 85.2  | 188.7 | 257.7 | 324.4 |       |       |       |       |       |       |       |       |       |       |
| Former East Germany [34]       | 1996                     | 1.5               |       | 3.8   | 6.7   | 14.2  | 27.2  | 57.4  | 95.6  | 163.5 | 300.7 |       |       |       |       |       |       |       |       |       |       |
| Former West Germany [34]       | 1996                     | 2.8               |       | 4.2   | 7.8   | 13.5  | 29.2  | 65.4  | 117.2 | 202.5 | 282.1 |       |       |       |       |       |       |       |       |       |       |
| Austria [31]                   | 1995                     | 6.7               |       | 7.5   | 13.9  | 28.0  | 54.5  | 80.2  | 175.9 | 268.3 | 285.3 | 311.7 |       |       |       |       |       |       |       |       |       |
| <b>Scandinavia</b>             |                          |                   |       |       |       |       |       |       |       |       |       |       |       |       |       |       |       |       |       |       |       |
| Viborg County, DK [37]         | 1978                     | 2.4               |       | 16.0  |       | 37.7  |       | 88.5  |       | 279.5 |       | 1.6   |       | 7.7   |       | 8.1   |       | 35.2  |       | 129.9 |       |
|                                | 1987                     | 2.5               |       | 21.2  |       | 49.2  |       | 134.2 |       | 305.5 |       | 1.7   |       | 6.3   |       | 19.7  |       | 66.5  |       | 90.4  |       |
|                                | 1988                     | 5.8               |       | 7.7   |       | 51.2  |       | 138.1 |       | 298.1 |       | 2.6   |       | 10.8  |       | 16.1  |       | 74.8  |       | 229.9 |       |
|                                | 1989                     | 1.6               |       | 8.6   |       | 54.5  |       | 153.5 |       | 222.2 |       | 2.6   |       | 4.5   |       | 25.0  |       | 57.1  |       | 195.0 |       |
|                                | 1990                     | 6.5               |       | 19.9  |       | 70.2  |       | 201.2 |       | 258.7 |       | 2.6   |       | 8.2   |       | 32.8  |       | 119.7 |       | 219.8 |       |
|                                | 1991                     | 7.3               |       | 21.8  |       | 66.9  |       | 154.5 |       | 389.3 |       | 1.7   |       | 8.4   |       | 25.2  |       | 111.1 |       | 104.7 |       |
|                                | 1992                     | 4.0               |       | 16.7  |       | 69.3  |       | 198.0 |       | 370.4 |       | 3.3   |       | 8.4   |       | 27.9  |       | 119.1 |       | 227.8 |       |
|                                | 1993                     | 2.4               |       | 14.2  |       | 50.7  |       | 165.6 |       | 224.9 |       | 4.8   |       | 6.6   |       | 29.4  |       | 91.5  |       | 235.0 |       |
|                                | 1994                     | 3.1               |       | 16.1  |       | 63.4  |       | 180.7 |       | 400.5 |       | 2.3   |       | 8.6   |       | 19.2  |       | 84.9  |       | 182.3 |       |
|                                | 1995                     | 6.7               |       | 17.1  |       | 67.3  |       | 215.9 |       | 388.5 |       | 4.5   |       | 4.8   |       | 27.0  |       | 94.4  |       | 255.1 |       |
|                                | 1996                     | 5.1               |       | 21.8  |       | 74.5  |       | 211.9 |       | 384.2 |       | 2.1   |       | 7.6   |       | 28.4  |       | 128.9 |       | 222.8 |       |
|                                | 1997                     | 4.2               |       | 19.0  |       | 76.2  |       | 197.5 |       | 449.2 |       | 3.4   |       | 10.5  |       | 37.5  |       | 138.8 |       | 321.8 |       |
|                                | Central Finland, FI [40] | 2002-2003         | 1.8   |       | 7.0   |       | 52.3  |       | 203.3 |       | 371.5 |       | 1.7   |       | 12.5  |       | 47.9  |       | 103.4 |       | 351.6 |
| Funen County, DK [41]          | 1996-1999                | 5.2               |       | 25.0  |       | 83.9  |       | 223.3 |       | 366.8 |       | 4.4   |       | 14.5  |       | 52.5  |       | 127.6 |       | 254.8 |       |
|                                | 2000-2003                | 5.7               |       | 20.5  |       | 88.8  |       | 174.0 |       | 315.4 |       | 5.3   |       | 9.3   |       | 38.6  |       | 95.3  |       | 285.7 |       |
| Østfold, NO [35]               | 1998-2003                | 3.9               |       | 9.9   |       | 13.7  |       | 32.2  |       | 68.5  |       | 137.3 |       | 236.6 |       | 366.8 |       | 396.3 |       | 4.2   |       |
| North and South                | 1992-1993                | 7.2               |       | 10.1  |       | 31.0  |       | 44.3  |       | 68.2  |       | 123.0 |       | 205.0 |       | 312.0 |       | 461.0 |       | 2.9   |       |

| Region, Country [reference]           | Study Period           | Age group (years) |       |       |       |       |       |       |       |       |       |       |       |       |       |       |       |       |       |       |     |  |     |  |  |     |  |  |
|---------------------------------------|------------------------|-------------------|-------|-------|-------|-------|-------|-------|-------|-------|-------|-------|-------|-------|-------|-------|-------|-------|-------|-------|-----|--|-----|--|--|-----|--|--|
|                                       |                        | Women             |       |       |       |       |       |       |       |       |       | Men   |       |       |       |       |       |       |       |       |     |  |     |  |  |     |  |  |
|                                       |                        | 50-54             | 55-59 | 60-64 | 65-69 | 70-74 | 75-79 | 80-84 | 85-89 | 90-94 | ≥95   | 50-54 | 55-59 | 60-64 | 65-69 | 70-74 | 75-79 | 80-84 | 85-89 | 90-94 | ≥95 |  |     |  |  |     |  |  |
| Trøndelag, NO [36]                    | 1997-1998              | 3.6               | 8.0   | 15.0  | 35.0  | 67.8  | 138.0 | 233.0 | 345.0 | 446.0 |       |       |       |       |       |       |       |       |       |       |     |  |     |  |  |     |  |  |
| Östergötland, SE [38]                 | 1982-1996              | 4.6               | 8.6   | 16.4  | 25.5  | 52.8  | 114.9 | 221.7 | 382.9 | 530.8 |       |       |       |       |       |       |       |       |       |       |     |  |     |  |  |     |  |  |
| Oslo, NO [39]                         | 1996-1997              | 5.3               | 11.4  | 16.1  | 40.5  | 77.1  | 142.5 | 282.6 | 475.5 | 618.0 |       |       |       |       |       |       |       |       |       |       |     |  |     |  |  |     |  |  |
| Malmö, SE [42]                        | 1992-1995              | 3.8               | 11.0  | 19.0  | 24.0  | 52.0  | 115.0 | 216.0 | 339.0 | 503.0 |       |       |       |       |       |       |       |       |       |       |     |  |     |  |  |     |  |  |
| Reykjavik, IS [26]                    | 1990-1992              | 3.6               | 18.6  | 19.9  | 40.3  | 83.8  | 131.1 | 194.5 | 379.2 | 373.3 | 530.0 |       |       |       |       |       |       |       |       |       |     |  |     |  |  |     |  |  |
| <b>Africa</b>                         |                        |                   |       |       |       |       |       |       |       |       |       |       |       |       |       |       |       |       |       |       |     |  |     |  |  |     |  |  |
| Cameroon [44]                         | 1996-1998              | 0.5               |       |       | 2.4   |       |       |       |       |       | 0.4   |       |       | 2.1   |       |       |       |       |       |       |     |  |     |  |  |     |  |  |
| Rabat, MA [43]                        | 2002                   | 0.7               | 1.3   | 7.5   | 2.3   | 8.5   | 21.5  |       |       | 1.4   | 1.0   | 2.8   | 4.5   | 13.2  | 15.7  |       |       |       |       |       |     |  |     |  |  |     |  |  |
| <b>Asia</b>                           |                        |                   |       |       |       |       |       |       |       |       |       |       |       |       |       |       |       |       |       |       |     |  |     |  |  |     |  |  |
| Riyadh, SA [45]                       | 1990-1991              | 1.5               |       |       | 7.9   |       |       | 39.4  |       |       | 2.2   |       |       | 3.6   |       |       | 25.1  |       |       |       |     |  |     |  |  |     |  |  |
| South Sharqiya, OM [58]               | 2002-2007              | 6.0               |       |       | 31.0  |       |       | 73.0  |       |       | 6.0   |       |       | 17.0  |       |       | 72.0  |       |       |       |     |  |     |  |  |     |  |  |
| Singapore [51]                        | 1991-1998 <sup>j</sup> | 1.5               | 3.5   | 8.5   | 19.6  | 103.7 |       |       | 2.2   |       |       | 3.5   |       |       | 10.8  |       |       |       |       |       |     |  |     |  |  |     |  |  |
|                                       | 1991-1998 <sup>k</sup> | 2.1               | 5.1   | 10.7  | 17.4  | 88.2  |       |       | 2.8   |       |       | 6.7   |       |       | 9.0   |       |       |       |       |       |     |  |     |  |  |     |  |  |
|                                       | 1991-1998 <sup>l</sup> | 0.6               | 2.1   | 5.3   | 20.1  | 64.0  |       |       | 1.4   |       |       | 0.8   |       |       | 5.0   |       |       |       |       |       |     |  |     |  |  |     |  |  |
| Tangshan, CN [61]                     | 1994                   | 1.4               | 2.0   | 5.2   | 8.3   | 15.6  |       |       | 3.5   |       |       | 6.0   |       |       | 7.0   |       |       |       |       |       |     |  |     |  |  |     |  |  |
| Singapore [51]                        | 1991                   | 2.1               | 3.4   | 8.6   | 21.8  | 36.0  | 123.7 |       |       | 1.8   |       |       | 4.0   |       |       | 13.5  |       |       |       |       |     |  |     |  |  |     |  |  |
|                                       | 1992                   | 1.1               | 2.6   | 9.1   | 19.0  | 32.6  | 133.1 |       |       | 2.2   |       |       | 3.2   |       |       | 6.9   |       |       |       |       |     |  |     |  |  |     |  |  |
|                                       | 1993                   | 2.0               | 2.1   | 9.2   | 19.4  | 39.9  | 137.8 |       |       | 2.7   |       |       | 3.1   |       |       | 5.1   |       |       |       |       |     |  |     |  |  |     |  |  |
|                                       | 1994                   | 1.7               | 2.7   | 11.3  | 14.8  | 48.5  | 135.5 |       |       | 2.6   |       |       | 3.1   |       |       | 4.5   |       |       |       |       |     |  |     |  |  |     |  |  |
|                                       | 1995                   | 1.0               | 3.3   | 8.9   | 18.4  | 43.5  | 144.4 |       |       | 1.3   |       |       | 3.3   |       |       | 5.2   |       |       |       |       |     |  |     |  |  |     |  |  |
|                                       | 1996                   | 1.3               | 5.5   | 6.3   | 17.2  | 44.3  | 147.3 |       |       | 2.8   |       |       | 4.3   |       |       | 4.9   |       |       |       |       |     |  |     |  |  |     |  |  |
|                                       | 1997                   | 1.1               | 3.7   | 6.6   | 21.3  | 42.4  | 135.6 |       |       | 1.7   |       |       | 3.3   |       |       | 5.1   |       |       |       |       |     |  |     |  |  |     |  |  |
|                                       | 1998                   | 1.2               | 3.4   | 5.4   | 23.8  | 38.4  | 135.3 |       |       | 2.6   |       |       | 3.2   |       |       | 5.0   |       |       |       |       |     |  |     |  |  |     |  |  |
| Malaysia [52]                         | 1997-1998              | 0.9               | 2.7   | 4.8   | 10.3  | 23.0  | 64.4  |       |       | 1.4   |       |       | 2.0   |       |       | 3.8   |       |       |       |       |     |  |     |  |  |     |  |  |
| Singapore [52]                        | 1997-1998              | 1.4               | 3.4   | 8.1   | 19.5  | 40.8  | 136.9 |       |       | 2.2   |       |       | 3.5   |       |       | 4.9   |       |       |       |       |     |  |     |  |  |     |  |  |
| Capital, Hawali and Farwania, KW [54] | 1992-1995 <sup>m</sup> | 2.8               |       |       | 12.4  |       |       | 45.8  |       |       | 5.0   |       |       | 9.6   |       |       | 34.9  |       |       |       |     |  |     |  |  |     |  |  |
| Gwangju City, Chonnam, KR [57]        | 1991                   | 0.9               |       |       | 2.2   |       |       | 6.6   |       |       | 1.6   |       |       | 6.1   |       |       | 47.9  |       |       |       |     |  |     |  |  |     |  |  |
| Shenyang, CN [60]                     | 1994                   | 1.9               |       |       | 9.0   |       |       | 28.6  |       |       | 2.1   |       |       | 3.5   |       |       | 6.7   |       |       |       |     |  |     |  |  |     |  |  |
| Kaohsiung City, TW [48]               | 1996                   | 2.9               |       |       | 8.8   |       |       | 12.6  |       |       | 4.4   |       |       | 9.7   |       |       | 23.2  |       |       |       |     |  |     |  |  |     |  |  |
| Iran [55]                             | 2003                   | 3.1               | 5.5   | 11.5  | 17.7  | 63.3  | 103.4 | 179.1 |       |       | 3.9   |       |       | 7.9   |       |       | 17.4  |       |       |       |     |  |     |  |  |     |  |  |
| Hong Kong [26]                        | 1991                   | 1.7               | 1.4   | 6.0   | 7.6   | 19.3  | 24.4  | 56.5  |       |       | 4.1   |       |       | 4.3   |       |       | 11.2  |       |       |       |     |  |     |  |  |     |  |  |
| Tottori Prefecture, JP [47]           | 1998                   | 2.8               | 4.9   | 7.5   | 19.4  | 43.9  | 82.4  | 158.8 | 257.3 |       |       | 3.3   |       |       | 3.4   |       |       | 3.7   |       |       |     |  |     |  |  |     |  |  |
| Niigata Prefecture, JP [49]           | 1999                   | 1.4               | 2.6   | 7.2   | 17.2  | 24.4  | 46.8  | 101.6 | 193.3 |       |       | 3.1   |       |       | 3.8   |       |       | 9.3   |       |       |     |  |     |  |  |     |  |  |
| Nagasaki Prefecture, JP [50]          | 2000                   | 1.4               | 7.6   | 2.5   | 9.9   | 16.6  | 43.5  | 133.7 | 222.5 |       |       | 1.4   |       |       | 3.4   |       |       | 2.8   |       |       |     |  |     |  |  |     |  |  |
| Chiang Mai, TH [52]                   | 2001                   | 0.8               | 1.5   | 7.2   | 10.9  | 26.8  | 56.6  | 108.8 | 210.9 |       |       | 0.4   |       |       | 3.3   |       |       | 5.8   |       |       |     |  |     |  |  |     |  |  |
| Hong Kong [52]                        | 2001                   | 0.8               | 2.8   | 5.2   | 12.9  | 31.8  | 55.4  | 102.1 | 200.0 |       |       | 2.4   |       |       | 2.2   |       |       | 4.1   |       |       |     |  |     |  |  |     |  |  |
| Shiraz, IR [59]                       | 1994                   | 1.2               | 2.0   | 4.5   | 7.7   | 19.6  | 39.4  | 79.2  | 137.4 |       |       | 3.4   |       |       | 6.3   |       |       | 4.7   |       |       |     |  |     |  |  |     |  |  |
| Beirut, LB [46]                       | 1996                   | 1.2               | 2.9   | 4.6   | 11.2  | 28.7  | 53.6  | 122.0 | 186.4 |       |       | 1.8   |       |       | 2.6   |       |       | 3.0   |       |       |     |  |     |  |  |     |  |  |
|                                       | 1990                   | 1.7               | 1.3   | 6.4   | 10.3  | 30.5  | 58.0  | 104.4 | 212.9 |       |       | 1.3   |       |       | 2.5   |       |       | 3.2   |       |       |     |  |     |  |  |     |  |  |
|                                       | 1997-1998              | 1.0               | 5.9   | 8.9   | 14.8  | 36.1  | 65.7  | 89.8  | 60.5  |       |       | 1.1   |       |       | 1.5   |       |       | 2.5   |       |       |     |  |     |  |  |     |  |  |
|                                       | 1997-1998              | 1.3               | 3.5   | 6.4   | 17.4  | 35.9  | 82.0  | 140.5 | 301.2 |       |       | 2.7   |       |       | 3.6   |       |       | 3.5   |       |       |     |  |     |  |  |     |  |  |
|                                       | 2000-2003              | 2.3               | 4.2   | 11.2  | 23.0  | 93.2  | 120.8 | 195.9 | 139.8 |       |       | 1.6   |       |       | 3.1   |       |       | 5.3   |       |       |     |  |     |  |  |     |  |  |
|                                       | 1996                   | 0.7               | 2.7   | 3.8   | 4.3   | 2.2   |       |       |       | 2.8   |       |       | 2.4   |       |       | 15.9  |       |       |       |       |     |  |     |  |  |     |  |  |
|                                       |                        | 0.7               |       |       | 2.7   |       |       | 3.8   |       |       | 4.3   |       |       | 2.2   |       |       | 1.2   |       |       | 0.7   |     |  | 3.2 |  |  | 1.2 |  |  |

| Region, Country<br>[reference] | Study Period | Age group (years) |       |       |       |       |       |       |       |       |     |       |       |       |       |       |       |       |       |       |
|--------------------------------|--------------|-------------------|-------|-------|-------|-------|-------|-------|-------|-------|-----|-------|-------|-------|-------|-------|-------|-------|-------|-------|
|                                |              | Women             |       |       |       |       |       |       |       |       |     | Men   |       |       |       |       |       |       |       |       |
|                                |              | 50-54             | 55-59 | 60-64 | 65-69 | 70-74 | 75-79 | 80-84 | 85-89 | 90-94 | ≥95 | 50-54 | 55-59 | 60-64 | 65-69 | 70-74 | 75-79 | 80-84 | 85-89 | 90-94 |
| Korea [53]                     | 2001         | 4.8               |       | 16.2  |       | 52.1  |       | 113.2 |       | 160.6 |     | 7.2   |       | 15.0  |       | 37.5  |       | 75.8  |       | 155.3 |
|                                | 2002         | 4.2               |       | 15.6  |       | 51.8  |       | 119.4 |       | 166.4 |     | 6.3   |       | 14.6  |       | 34.5  |       | 72.2  |       | 118.3 |
|                                | 2003         | 3.8               |       | 16.1  |       | 50.4  |       | 122.0 |       | 161.6 |     | 5.7   |       | 14.5  |       | 34.0  |       | 73.3  |       | 128.5 |
|                                | 2004         | 3.8               |       | 15.9  |       | 51.0  |       | 122.1 |       | 175.1 |     | 5.7   |       | 14.8  |       | 32.5  |       | 73.3  |       | 133.1 |
| Japan [56]                     | 1997         | 2.4               |       | 9.1   |       | 40.8  |       | 147.8 |       | 281.0 |     | 2.0   |       | 5.1   |       | 17.3  |       | 57.4  |       | 128.9 |
| Beijing, CN [26]               | 1990-1992    | 1.8               | 3.2   | 5.6   | 9.1   | 16.4  | 14.1  | 22.4  | 21.9  | 40.1  | 1.9 | 3.3   | 8.4   | 8.8   | 13.3  | 16.1  | 28.2  | 32.8  | 44.5  |       |
| <b>Australia</b>               |              |                   |       |       |       |       |       |       |       |       |     |       |       |       |       |       |       |       |       |       |
| New South Wales,<br>AU [62]    | 1990-1991    |                   |       | 3.8   |       | 22.6  |       | 96.4  |       | 337.2 |     |       |       | 3.2   |       | 12.5  |       | 47.8  |       | 213.2 |
|                                | 1991-1992    |                   |       | 4.7   |       | 21.0  |       | 102.1 |       | 347.3 |     |       |       | 2.9   |       | 14.1  |       | 43.4  |       | 205.9 |
|                                | 1992-1993    |                   |       | 3.5   |       | 21.7  |       | 101.0 |       | 351.1 |     |       |       | 2.7   |       | 11.1  |       | 44.2  |       | 199.4 |
|                                | 1993-1994    |                   |       | 3.2   |       | 21.8  |       | 96.3  |       | 337.3 |     |       |       | 3.1   |       | 12.8  |       | 50.2  |       | 206.4 |
|                                | 1994-1995    |                   |       | 3.0   |       | 20.4  |       | 94.8  |       | 334.1 |     |       |       | 2.7   |       | 10.2  |       | 46.3  |       | 198.9 |
|                                | 1995-1996    |                   |       | 3.0   |       | 19.1  |       | 94.8  |       | 317.2 |     |       |       | 2.7   |       | 11.1  |       | 47.8  |       | 178.0 |
|                                | 1996-1997    |                   |       | 2.6   |       | 19.6  |       | 94.8  |       | 341.2 |     |       |       | 2.6   |       | 9.9   |       | 48.6  |       | 202.1 |
|                                | 1997-1998    |                   |       | 3.2   |       | 20.2  |       | 95.3  |       | 341.0 |     |       |       | 2.5   |       | 11.2  |       | 52.6  |       | 199.8 |
|                                | 1998-1999    |                   |       | 3.5   |       | 20.4  |       | 96.1  |       | 353.9 |     |       |       | 2.8   |       | 11.7  |       | 47.9  |       | 198.9 |
|                                | 1999-2000    |                   |       | 3.4   |       | 19.3  |       | 91.4  |       | 349.4 |     |       |       | 2.8   |       | 12.1  |       | 50.6  |       | 212.6 |
| Southern Victoria,<br>AU [63]  | 1994-1996    | 1.0               | 4.0   | 3.0   | 17.0  | 32.0  | 80.0  | 138.0 | 334.0 | 375.0 | 3.0 | 5.0   | 5.0   | 6.0   | 21.0  | 39.0  | 43.0  | 193.0 | 263.0 |       |
