# Supplementary material for: Geographic trends in incidence of hip fractures: a comprehensive literature review
Source: Springer Nature journal article supplement (doi:10.1007/s00198-011-1596-z), 2011-04-12
Supplement: 198_2011_1596_MOESM3_ESM.pdf [file 198_2011_1596_MOESM3_ESM.pdf]

**Caption: Overall annual directly age-standardized and age-sex-standardized hip fracture rates (per 10,000 population) by sex and geographic area.**

| Region, Country<br>[reference]        | Study Period                   | Age-Standardized<br>Rates |      | Age-, Sex-<br>Standardized<br>Rates |      |
|---------------------------------------|--------------------------------|---------------------------|------|-------------------------------------|------|
|                                       |                                | Women                     | Men  |                                     |      |
| <b>North America</b>                  |                                |                           |      |                                     |      |
| New York City, US [18]                | 1988-2002 (Asians)             | 12.3                      | 7.3  | 10.2                                |      |
|                                       | 1988-2002 (Blacks)             | 9.9                       | 8.5  | 9.4                                 |      |
|                                       | 1988-2002 (Hispanics)          | 10.0                      | 6.3  | 8.6                                 |      |
|                                       | 1988-2002 (Whites)             | 33.3                      | 16.9 | 26.5                                |      |
| Ontario, CA [19]                      | 1981-1992                      | 33.3                      | 18.3 | 27.3                                |      |
| Quebec, CA [20]                       | 1981                           | 25.2                      | 13.7 | 20.5                                |      |
|                                       | 1982                           | 25.0                      | 14.3 | 20.7                                |      |
|                                       | 1983                           | 26.8                      | 14.7 | 21.9                                |      |
|                                       | 1984                           | 25.7                      | 14.4 | 21.1                                |      |
|                                       | 1985                           | 25.9                      | 14.9 | 21.4                                |      |
|                                       | 1986                           | 24.6                      | 14.3 | 20.4                                |      |
|                                       | 1987                           | 25.9                      | 14.5 | 21.3                                |      |
|                                       | 1988                           | 26.8                      | 15.6 | 22.3                                |      |
|                                       | 1989                           | 25.4                      | 15.2 | 21.3                                |      |
|                                       | 1990                           | 26.5                      | 13.9 | 21.4                                |      |
|                                       | 1991                           | 24.8                      | 14.6 | 20.7                                |      |
|                                       | 1992                           | 25.0                      | 14.2 | 20.5                                |      |
| Oahu, Hawaii, US [21]                 | 1991-1995 (All races)          | 14.5                      | 8.3  | 12.0                                |      |
|                                       | 1991-1995 (Caucasians)         | 12.1                      | 8.0  | 10.3                                |      |
|                                       | 1991-1995 (Japanese-Americans) | 14.0                      | 8.4  | 11.9                                |      |
| <b>Latin America</b>                  |                                |                           |      |                                     |      |
| La Plata, AR [22]                     | 1989-1990                      | 34.1                      | 11.7 | 25.3                                |      |
| Sobral, BR [23]                       | 1996-2000                      | 11.5                      | 5.4  | 9.0                                 |      |
| Mexico City, MX [24]                  | 2000                           | 16.3                      | 10.1 | 13.8                                |      |
| Rosario, Santa Fe, AR [25]            | 2001-2002                      | 33.5                      | 13.2 | 25.6                                |      |
| Porto Alegre, BR [26]                 | 1990-1992 (high estimate)      | 23.1                      | 11.9 | 18.6                                |      |
|                                       | 1990-1992 (low estimate)       | 14.3                      | 7.3  | 11.5                                |      |
| <b>Europe (excluding Scandinavia)</b> |                                |                           |      |                                     |      |
| Budapest, HU [26]                     | 1992                           | 22.7                      | 19.1 | 21.3                                |      |
| Northern Ireland, UK [27]             | 1985                           | 28.3                      | 13.6 | 22.0                                |      |
|                                       | 1991                           | 30.2                      | 13.5 | 23.3                                |      |
|                                       | 1994                           | 31.6                      | 14.6 | 24.5                                |      |
|                                       | 1997                           | 32.3                      | 16.5 | 26.1                                |      |
| Cantabria, ES [28]                    | 1988                           | 15.8                      | 9.1  | 13.2                                |      |
|                                       | 2002                           | 18.3                      | 8.2  | 14.7                                |      |
| Germany [29]                          | 1995                           | 28.8                      | 16.2 | 23.8                                |      |
|                                       | 1996                           | 30.1                      | 17.4 | 25.1                                |      |
|                                       | 1997                           | 29.1                      | 16.8 | 24.2                                |      |
|                                       | 1998                           | 29.4                      | 17.0 | 24.5                                |      |
|                                       | 1999                           | 29.3                      | 17.1 | 24.5                                |      |
|                                       | 2000                           | 28.1                      | 16.3 | 23.5                                |      |
|                                       | 2001                           | 28.7                      | 16.6 | 24.0                                |      |
|                                       | 2002                           | 30.3                      | 17.9 | 25.5                                |      |
|                                       | 2003                           | 30.5                      | 19.0 | 26.1                                |      |
|                                       | 2004                           | 29.4                      | 17.9 | 24.9                                |      |
| Vaud, CH [30]                         | 1986                           | 32.2                      | 13.9 | 24.6                                |      |
|                                       | 1987                           | 32.4                      | 16.6 | 26.1                                |      |
|                                       | 1988                           | 34.8                      | 14.4 | 26.5                                |      |
|                                       | 1989                           | 34.2                      | 17.8 | 27.6                                |      |
|                                       | 1990                           | 31.3                      | 18.7 | 26.3                                |      |
|                                       | 1991                           | 33.4                      | 16.5 | 26.7                                |      |
|                                       | 1995                           | 35.7                      | 22.7 | 30.6                                |      |
| Austria [31]                          | 1994                           | 38.8                      | 24.0 | 33.2                                |      |
|                                       | Austria [32]                   | 1995                      | 40.3 | 25.5                                | 34.7 |
|                                       |                                | 1996                      | 42.1 | 25.4                                | 35.6 |
|                                       |                                | 1997                      | 42.9 | 26.5                                | 36.7 |
|                                       |                                | 1998                      | 42.5 | 25.6                                | 36.0 |
|                                       |                                | 1999                      | 43.7 | 26.0                                | 36.9 |

| Region, Country<br>[reference]                 | Study Period           | Age-Standardized<br>Rates |              | Age-, Sex-<br>Standardized<br>Rates |
|------------------------------------------------|------------------------|---------------------------|--------------|-------------------------------------|
|                                                |                        | Women                     | Men          |                                     |
|                                                | 2000                   | 42.3                      | 26.5         | 36.2                                |
|                                                | 2001                   | 43.8                      | 26.8         | 37.3                                |
|                                                | 2002                   | 43.3                      | 26.7         | 37.0                                |
|                                                | 2003                   | 44.4                      | 27.9         | 38.0                                |
|                                                | 2004                   | 43.0                      | 27.9         | 37.2                                |
|                                                | 2005                   | 44.2                      | 29.4         | 38.5                                |
|                                                | 2006                   | 43.2                      | 30.1         | 38.1                                |
| Greece [33]                                    | 1992                   | 31.6                      | 17.7         | 25.8                                |
| Former East Germany [34]                       | 1996                   | 20.9                      | 11.2         | 17.2                                |
| Former West Germany [34]                       | 1996                   | 23.6                      | 13.5         | 19.7                                |
| <b>Scandinavia</b>                             |                        |                           |              |                                     |
| Reykjavik, Iceland [26]                        | 1990-1992              | 50.4                      | 24.6         | 39.2                                |
| Østfold, Norway [35]                           | 1998-2003              | 47.0                      | 29.4         | 39.6                                |
| South and southern North<br>Trøndelag, NO [36] | 1992-1993<br>1997-1998 | 49.4<br>47.0              | 26.0<br>29.4 | 39.2<br>39.5                        |
| Viborg County, DK [37]                         | 1978                   | 20.3                      | 7.7          | 15.1                                |
|                                                | 1987                   | 26.9                      | 11.0         | 20.3                                |
|                                                | 1988                   | 25.1                      | 13.8         | 20.4                                |
|                                                | 1989                   | 24.2                      | 12.2         | 19.3                                |
|                                                | 1990                   | 35.8                      | 18.6         | 28.3                                |
|                                                | 1991                   | 34.4                      | 15.4         | 26.3                                |
|                                                | 1992                   | 34.3                      | 18.2         | 27.6                                |
|                                                | 1993                   | 26.3                      | 17.0         | 22.4                                |
|                                                | 1994                   | 31.9                      | 13.8         | 24.5                                |
|                                                | 1995                   | 36.6                      | 16.3         | 28.1                                |
|                                                | 1996                   | 38.2                      | 18.0         | 29.6                                |
|                                                | 1997                   | 37.0                      | 22.6         | 30.9                                |
| Östergötland, SE [38]                          | 1982-1996              | 44.0                      | 26.3         | 36.9                                |
| Oslo, NO [39]                                  | 1996-1997              | 56.4                      | 35.0         | 47.7                                |
| Central Finland, FI [40]                       | 2002-2003              | 27.8                      | 22.3         | 25.9                                |
| Funen County, DK [41]                          | 1996-1999              | 44.6                      | 29.0         | 38.1                                |
|                                                | 2000-2003              | 41.0                      | 22.2         | 33.1                                |
| Malmö, SE [42]                                 | 1992-1995              | 43.1                      | 28.4         | 37.1                                |
| <b>Africa</b>                                  |                        |                           |              |                                     |
| Rabat, MA [43]                                 | 2002                   | 5.9                       | 5.2          | 5.6                                 |
| Cameroon [44]                                  | 1996-1998              | 1.3                       | 1.0          | 1.2                                 |
| <b>Asia</b>                                    |                        |                           |              |                                     |
| Beijing, CN [26]                               | 1990-1992              | 7.7                       | 8.4          | 8.0                                 |
| Hong Kong [26]                                 | 1991                   | 29.9                      | 19.3         | 25.7                                |
| Riyadh, SA [45]                                | 1990-1991              | 12.7                      | 8.3          | 10.8                                |
| Beirut, LB [46]                                | 1996                   | 2.1                       | 1.6          | 1.9                                 |
| Tottori Prefecture, JP [47]                    | 1998                   | 19.9                      | 8.6          | 15.3                                |
|                                                | 1999                   | 20.3                      | 9.4          | 16.2                                |
|                                                | 2000                   | 20.4                      | 10.6         | 16.6                                |
|                                                | 2001                   | 20.5                      | 10.4         | 16.6                                |
| Kaohsiung City, TW [48]                        | 1996                   | 32.7                      | 18.6         | 27.0                                |
| Niiigata Prefecture, JP [49]                   | 1994                   | 14.5                      | 8.3          | 12.1                                |
| Nagasaki Prefecture, JP [50]                   | 1989                   | 20.3                      | 8.3          | 15.5                                |
|                                                | 1990                   | 20.7                      | 8.2          | 15.7                                |
| Singapore [51]                                 | 1991                   | 26.9                      | 14.3         | 21.7                                |
|                                                | 1992                   | 27.2                      | 14.6         | 22.0                                |
|                                                | 1993                   | 28.9                      | 13.3         | 22.4                                |
|                                                | 1994                   | 29.2                      | 14.1         | 22.9                                |
|                                                | 1995                   | 30.0                      | 13.6         | 23.2                                |
|                                                | 1996                   | 30.4                      | 14.0         | 23.7                                |
|                                                | 1997                   | 28.8                      | 15.3         | 23.2                                |
|                                                | 1998                   | 28.4                      | 14.7         | 22.8                                |
|                                                | 1991-1998 (Chinese)    | 30.6                      | 15.6         | 24.2                                |
|                                                | 1991-1998 (Indian)     | 27.4                      | 12.1         | 20.8                                |
|                                                | 1991-1998 (Malay)      | 19.9                      | 6.6          | 14.1                                |
| Chiang Mai, TH [52]                            | 1997-1998              | 18.9                      | 9.9          | 14.9                                |
| Hong Kong [52]                                 | 1997-1998              | 28.3                      | 16.4         | 23.6                                |
| Malaysia [52]                                  | 1997-1998              | 14.5                      | 7.7          | 11.7                                |
| Singapore [52]                                 | 1997-1998              | 28.8                      | 14.3         | 22.8                                |
| Korea [53]                                     | 2001                   | 24.4                      | 20.3         | 22.8                                |
|                                                | 2002                   | 24.4                      | 18.7         | 22.2                                |

| Region, Country<br>[reference]      | Study Period               | Age-Standardized<br>Rates |      | Age-, Sex-<br>Standardized<br>Rates |
|-------------------------------------|----------------------------|---------------------------|------|-------------------------------------|
|                                     |                            | Women                     | Men  |                                     |
|                                     | 2003                       | 24.2                      | 18.5 | 21.9                                |
|                                     | 2004                       | 24.4                      | 18.3 | 22.0                                |
| Capital, Hawali & Farwania, KW [54] | 1992-1995 (Kuwaitis)       | 21.3                      | 19.1 | 20.4                                |
|                                     | 1992-1995 (Non-Kuwaitis)   | 26.7                      | 20.2 | 23.8                                |
| Iran [55]                           | 2003                       | 10.4                      | 8.5  | 9.6                                 |
| Japan [56]                          | 1997                       | 22.5                      | 10.1 | 17.5                                |
| Gwangju City & Chonnam, KR [57]     | 1991                       | 3.1                       | 4.7  | 3.8                                 |
|                                     | 2001                       | 13.0                      | 13.2 | 13.2                                |
| South Sharqiya, OM [58]             | 2002-2007                  | 29.8                      | 25.5 | 27.7                                |
| Shiraz, IR [59]                     | 2000-2003                  | 36.9                      | 30.3 | 33.7                                |
| Shenyang, CN [60]                   | 1994                       | 7.4                       | 9.4  | 8.2                                 |
| Tangshan, CN [61]                   | 1994                       | 6.5                       | 6.7  | 6.7                                 |
| <b>Australia</b>                    |                            |                           |      |                                     |
| New South Wales, AU [62]            | 1990-1991                  | 28.1                      | 16.3 | 23.4                                |
|                                     | 1991-1992                  | 29.2                      | 15.8 | 23.8                                |
|                                     | 1992-1993                  | 28.6                      | 14.9 | 23.1                                |
|                                     | 1993-1994                  | 27.5                      | 16.4 | 23.1                                |
|                                     | 1994-1995                  | 26.8                      | 14.9 | 22.1                                |
|                                     | 1995-1996                  | 26.0                      | 14.7 | 21.6                                |
|                                     | 1996-1997                  | 26.6                      | 15.1 | 22.0                                |
|                                     | 1997-1998                  | 27.1                      | 15.8 | 22.6                                |
|                                     | 1998-1999                  | 27.8                      | 15.5 | 22.9                                |
|                                     | 1999-2000                  | 26.8                      | 16.3 | 22.7                                |
|                                     | Southern Victoria, AU [63] | 1994-1996                 | 28.4 | 16.1                                |
